# Supplementary material
Source: publisher figshare collection journal article supplement (https://acs.figshare.com/ndownloader/files/5178955)
Supplement: Supplementary file 1 [file 5178955]

# Use of $\text{InCl}_3$ as a Cocatalyst and a $\text{Cl}_2\text{Pd}(\text{DPEphos})\text{--P}(\text{2-Furyl})_3$ Catalyst System for One-Pot Hydrometalation–Cross-Coupling and Carbometalation–Cross-Coupling Tandem Processes

Mingxing Qian, Zhihong Huang, Ei-ichi Negishi\*

*Herbert C. Brown Laboratories of Chemistry, Purdue University, 560 Oval Drive, West Lafayette, Indiana 47907-2084*

## Supplementary Data

**General.** All experiments were conducted under argon atmosphere. THF and diethyl ether were dried and distilled by the standard methods.  $\text{ZnBr}_2$  was flame-dried under vacuum prior to use.  $\text{Pd}(\text{PPh}_3)_4$ ,<sup>[a]</sup>  $\text{Pd}(\text{DPEphos})\text{Cl}_2$ ,<sup>[b]</sup> and  $\text{Pd}(\text{TFP})_2\text{Cl}_2$ <sup>[c]</sup> were prepared according to the literature procedures.  $\text{PdCl}_2$ ,  $\text{PPh}_3$ ,  $\text{DPEphos}$ , tri(2-furyl)phosphine (TFP),  $\text{dppf}$ ,  $\text{P}(t\text{-Bu})_3$ ,  $\text{Pd}_2(\text{dba})_3$ ,  $\text{Pd}(\text{dppf})\text{Cl}_2$  were purchased from Strem and used as received.  $\text{InCl}_3$  was purchased from Johnson Matthey.

Flash chromatographic separations were carried out on 230 – 400 mesh silica gel 60. Gas chromatography was performed on an HP 6890 Gas Chromatograph using a HP-5 capillary column (30 m  $\times$  0.32 mm, 0.5  $\mu\text{m}$  film) with appropriate hydrocarbons as internal standards.  $^1\text{H}$  and  $^{13}\text{C}$  NMR spectra were recorded in  $\text{CDCl}_3$  on a Varian Inova-300 spectrometer. IR spectra were recorded on a Perkin-Elmer Spectrum 2000 FT-IR spectrometer. LRMS and HRMS were obtained on Hewlett Packed 5995 GC-MS and Finnigan MATL95 mass spectrometers, respectively. Microanalyses were performed on a Perkin-Elmer 2400 Series II CHNS/O Analyzer.

**Use of InCl<sub>3</sub> as a Cocatalyst and a Cl<sub>2</sub>Pd(DPEphos)–P(2-Furyl)<sub>3</sub> Catalyst System for One-Pot Hydroalumination–Cross-Coupling. Representative Procedure A. (a) (1*E*,3*E*)-1-Bromo-1,3-decadiene.** To 0.30 mL (2.0 mmol) 1-octyne in 1 mL of heptane was added 0.37 mL (2.1 mmol, 98%) of DIBAH at 23 °C. This mixture was stirred at 50 °C for 4 h, then cooled to 0 °C, followed by addition of a suspension of dry InCl<sub>3</sub> (150 mg, 0.68 mmol, 0.34 molar equiv) in THF (5 mL) at 0 °C. After 30 min., to this solution was added via cannula a mixture of (*E*)-1-iodo-2-bromoethylene (559 mg, 2.4 mmol), Pd(DPEphos)Cl<sub>2</sub> (14 mg, 20 μmol), TFP (9.3 mg, 40 μmol) and DIBAH (40 μL, 1.0 M in hexane, 40 μmol) in THF (2 mL) at 0 °C. The reluctant mixture was stirred at 0 °C and monitored by GLC analysis. After 4 h, the reaction was quenched with water, extracted with ether, dried over MgSO<sub>4</sub>, filtered and concentrated. Flash chromatography (silica gel, hexane) afforded the title compound (354 mg, 82%, stereoisomeric purity ≥98%): <sup>1</sup>H NMR (300 MHz, CDCl<sub>3</sub>) δ 0.91 (t, *J* = 6.7 Hz, 3 H), 1.1-1.35 (m, 8 H), 1.8-1.9 (m, 2 H), 5.47 (dt, *J* = 6.9 and 15.1 Hz, 1 H), 5.72 (dd, *J* = 10.8 and 15.1 Hz, 1 H), 5.92 (d, *J* = 13.5 Hz, 1 H), 6.62 (dd, *J* = 10.8 and 13.5 Hz, 1 H); <sup>13</sup>C NMR (75 MHz, CDCl<sub>3</sub>) δ 14.05, 22.58, 28.81, 28.89, 31.66, 32.59, 105.99, 127.49, 136.55, 137.71; IR (neat) 3066, 3019, 1645, 1583, 977, 734, 649 cm<sup>-1</sup>; HRMS calculated for C<sub>10</sub>H<sub>17</sub>Br [M]<sup>+</sup>: 216.0514; found: 216.0517.

In two other runs of the same reaction, 0.10 and 0.068 molar equiv of InCl<sub>3</sub> were used, and the title compound was formed in 82 and 76% yields, respectively, in 8-10 h.

**(b) (1E,3E)-1-Chloro-1,3-decadiene.**<sup>[d]</sup> The title compound was prepared according to Representative Procedure A except that (*E*)-1-iodo-2-chloroethylene (452 mg, 2.4 mmol) was used. Flash chromatograph (silica gel, hexane) afforded the title compound (293 mg, 85%, stereoisomeric purity >98%): <sup>1</sup>H NMR (300 MHz, CDCl<sub>3</sub>) 0.88 (t, *J* = 7.2 Hz, 3 H), 1.2-1.45 (m, 8 H), 2.0-2.15 (m, 2 H), 5.74 (dt, *J* = 6.9 and 15.1 Hz, 1 H), 6.00 (dd, *J* = 11.0 and 15.1 Hz, 1 H), 6.09 (d, *J* = 13.2 Hz, 1 H), 6.45 (dd, *J* = 11.0 and 13.2 Hz, 1 H); <sup>13</sup>C NMR (75 MHz, CDCl<sub>3</sub>) 14.05, 22.59, 28.83, 29.01, 31.68, 32.63, 118.18, 126.02, 133.87, 136.28; IR (neat) 3066, 2958, 1693, 1583, 1467, 1379, 1284, 908 cm<sup>-1</sup>.

In another run, 0.1 molar equiv of InCl<sub>3</sub> was used, and the desired product was formed in 80% yield over 8 h.

**Use of InCl<sub>3</sub> as a Cocatalyst and a Cl<sub>2</sub>Pd(DPEphos)–P(2-Furyl)<sub>3</sub> Catalyst System for One-Pot Hydrozirconation–Cross-Coupling. Representative Procedure B.** (a) **(1E,3E)-1-Bromo-1,3-decadiene.** To 0.15 mL (1.0 mmol) 1-octyne in 3 mL of THF was added 284 mg (1.1 mmol) of Cp<sub>2</sub>ZrHCl at 23 °C. This mixture was stirred at 23 °C for 4 h, then cooled to 0 °C, followed by addition of a suspension of dry InCl<sub>3</sub> (75 mg, 0.34 mmol, 0.34 molar equiv) in THF (2 mL) at 0 °C. After 30 min., to this solution was added via cannula a mixture of (*E*)-1-iodo-2-bromoethylene (280 mg, 1.2 mmol), Pd(DPEphos)Cl<sub>2</sub> (7.0 mg, 10 μmol), TFP (4.7 mg, 20 μmol), and DIBAH (20 mL, 1.0 M in hexane, 20 μmol) in THF (1 mL) at 0 °C. The resultant mixture was stirred at 0 °C and monitored by GLC analysis. After 4 h, an aliquot was analyzed by GLC with decane

as an internal standard. Analysis indicated the formation of the title compound in 77% yield.

In two other runs, the same reaction was run in the presence of 0.10 and 0.068 molar equiv of  $\text{InCl}_3$ . These reactions produced the title product in 76 and 70% yields, respectively, in 8-10 h.

**(b) (1E,3E)-1-Bromo-4-phenyl-1,3-butadiene.<sup>[e]</sup>** The title compound was prepared according to Representative Procedure B except that phenylacetylene (204 mg, 2.0 mmol) was used. Yield: 351 mg (84%); Stereoisomeric purity: >99%;  $^1\text{H}$  NMR (300 MHz,  $\text{CDCl}_3$ )  $\delta$  6.36 (d,  $J = 13.5$  Hz, 1 H), 6.45-6.6 (m, 2 H), 6.84 (dd,  $J = 10.3$  and 13.5 Hz, 1 H), 7.2-7.35 (m, 5 H);  $^{13}\text{C}$  NMR (75 MHz,  $\text{CDCl}_3$ )  $\delta$  108.89, 125.89, 126.43 (2C), 127.96, 128.62 (2C), 133.24, 136.43, 137.55; IR (neat) 3152, 3066, 1949, 1627, 1570, 1183, 975, 912  $\text{cm}^{-1}$ ; Anal. Calcd. for  $\text{C}_{10}\text{H}_9\text{Br}$ : C, 57.44; H, 4.34; Found: C, 57.82; H, 4.46.

**(c) (1E,3E)-1-Bromo-3-ethyl-1,3-hexadiene:** The title compound was prepared according to Representative Procedure B except that 3-hexyne (164 mg, 2.0 mmol) was used. Yield: 308 mg (82%); Stereoisomeric purity: >98%;  $^1\text{H}$  NMR (300 MHz,  $\text{CDCl}_3$ )  $\delta$  0.97 (t,  $J = 7.4$  Hz, 6 H), 2.0-2.2 (m, 4 H), 5.38 (t,  $J = 7.3$  Hz, 1H), 6.14 (d,  $J = 13.9$  Hz, 1H), 6.58 (d,  $J = 13.9$  Hz, 1 H);  $^{13}\text{C}$  NMR (75 MHz,  $\text{CDCl}_3$ )  $\delta$  14.26, 14.72, 20.44, 21.84, 102.82, 135.08, 137.72, 140.03; IR (neat) 2969, 2876, 1676, 1585, 1471, 1377, 945, 861, 734, 651  $\text{cm}^{-1}$ .

**Use of  $\text{InCl}_3$  as a Cocatalyst and a  $\text{Cl}_2\text{Pd}(\text{DPEphos})\text{--P}(\text{2-Furyl})_3$  Catalyst System for One-Pot Carboalumination–Cross-Coupling. Representative Procedure C. (a) **(1*E*,3*E*)-1-Bromo-4-methyl-1,3-decadiene.** To 117 mg (0.40 mmol) of  $\text{Cp}_2\text{ZrCl}_2$  in 1 mL of  $\text{CH}_2\text{Cl}_2$  was added 0.20 mL (2.1 mmol) of  $\text{Me}_3\text{Al}$  at 23 °C. After this mixture was added to 0.30 mL (2.0 mmol) of 1-octyne, the resultant mixture was stirred at 23 °C for 6 h. To this was sequentially added a suspension of dry  $\text{InCl}_3$  (150 mg, 0.68 mmol, 0.34 molar equiv) in THF (5 mL) at 0 °C. After 30 min., to this solution was added via cannula a mixture of (*E*)-1-iodo-2-bromoethylene (559 mg, 2.4 mmol),  $\text{Pd}(\text{DPEphos})\text{Cl}_2$  (14 mg, 20  $\mu\text{mol}$ ), TFP (9.3 mg, 40  $\mu\text{mol}$ ) and DIBAH (40  $\mu\text{L}$ , 1.0 M in hexane, 40  $\mu\text{mol}$ ) in THF (2 mL) at 0 °C, this mixture was prepared in this order at 0 °C for 5 min.. The reluctant mixture was stirred at 0 °C and monitored by GLC analysis. After 4 h, the reaction was quenched with water, extracted with ether, dried over  $\text{MgSO}_4$ , filtered and concentrated. Flash chromatograph (silica gel, hexane) afforded the title compound (402 mg, 87%, stereoisomeric purity >98%):  $^1\text{H}$  NMR (300 MHz,  $\text{CDCl}_3$ ) 0.88 (t,  $J$  = 6.5 Hz, 3 H), 1.1-1.45 (m, 8 H), 1.70 (s, 3 H), 2.01 (t,  $J$  = 7.1 Hz, 2 H), 5.76 (d,  $J$  = 11.3 Hz, 1 H), 6.16 (d,  $J$  = 13.2 Hz, 1 H), 6.95 (dd,  $J$  = 11.3 and 13.2 Hz, 1 H);  $^{13}\text{C}$  NMR (75 MHz,  $\text{CDCl}_3$ ) 14.03, 16.67, 22.58, 27.57, 28.93, 31.71, 39.76, 106.04, 121.93, 134.21, 140.86; IR (neat) 3065, 2923, 1697, 1643, 975, 869  $\text{cm}^{-1}$ ; Anal. Calcd. for  $\text{C}_{11}\text{H}_{19}\text{Br}$ : C, 57.15; H, 8.29; Found: C, 56.78; H, 8.18.**

In two other runs, the same reaction was run in the presence of 0.10 and 0.068 molar equiv of  $\text{InCl}_3$ . These reactions produced the title product in 85 and 77% yield, respectively, in 8-10 h.

**(b) (1E,3E)-1-Chloro-4-methyl-1,3-decadiene.** The title compound was prepared according to Representative Procedure C except that (*E*)-1-iodo-2-chloroethylene (452 mg, 2.4 mmol) was used. Yield: 347 mg (93%); Stereoisomeric purity: >99%; <sup>1</sup>H NMR (300 MHz, CDCl<sub>3</sub>) δ 0.88 (t, *J* = 6.4 Hz, 3 H), 1.2-1.35 (m, 8 H), 1.71 (s, 3 H), 2.03 (t, *J* = 7.0 Hz, 2 H), 5.77 (d, *J* = 11.1 Hz, 1 H), 6.06 (d, *J* = 12.9 Hz, 1 H), 6.64 (dd, *J* = 11.1 and 12.9 Hz, 1 H); <sup>13</sup>C NMR (75 MHz, CDCl<sub>3</sub>) 14.03, 16.45, 22.62, 27.68, 28.97, 31.75, 39.80, 118.15, 120.41, 130.35, 140.61; IR (neat) 3064, 2927, 1699, 1647, 977, 858 cm<sup>-1</sup>; Anal. Calcd. for C<sub>11</sub>H<sub>19</sub>Cl: C, 72.96; H, 5.51; Found: C, 73.09; H, 5.65.

**(c) (3E,5E)-3-Methyl-6-bromo-3,5-hexadien-1-ol.** The title compound was prepared according to Representative Procedure C except that 3-butyn-1-ol (0.15 mL, 140 mg, 2.0 mmol) and Me<sub>3</sub>Al (0.58 mL, 6 mmol) were used. Yield: 267 mg (70%); Stereoisomeric purity: >98%; <sup>1</sup>H NMR (300 MHz, CDCl<sub>3</sub>) δ 1.76 (s, 3 H), 2.15 (s, 1H), 2.28 (t, *J* = 6.3 Hz, 2 H), 3.69 (t, *J* = 6.3 Hz, 2 H), 5.85 (d, *J* = 11.3 Hz, 1 H), 6.25 (d, *J* = 13.3 Hz, 1 H), 6.93 (dd, *J* = 11.3 and 13.3 Hz, 1 H); <sup>13</sup>C NMR (75 MHz, CDCl<sub>3</sub>) 16.63, 42.56, 60.07, 107.37, 124.22, 133.63, 136.55; IR (neat) 3067, 2252, 1644, 1046, 907, 733 cm<sup>-1</sup>; Anal. Calcd. for C<sub>7</sub>H<sub>11</sub>BrO: C, 44.00; H, 5.80; Found: C, 43.96; H, 5.85.

**Use of Preformed Organozincs and a Cl<sub>2</sub>Pd(DPEphos)-P(2-Furyl)<sub>3</sub> Catalyst System for Cross-Coupling. Representative Procedure D. (a) (1E,3E)-1-Bromo-1,3-decadiene.** To (*E*)-1-iodo-1-octene (476 mg, 2.0 mmol) in ether (5 mL) cooled to -78 °C was added *t*-BuLi (2.4 mL, 1.7 M in pentane, 4.1 mmol). The resultant solution was

stirred at -78 °C for 30 min., followed by addition of dry ZnBr<sub>2</sub> (450 mg, 2.0 mmol) in THF (3 mL). The mixture thus obtained was stirred at -78 °C for 5 min. and then warmed to 0 °C over 25 min. To this was added *via* cannula a mixture of (*E*)-1-iodo-2-bromoethylene (559 mg, 2.4 mmol), Pd(DPEPhos)Cl<sub>2</sub> (14 mg, 20 μmol), TFP (9.3 mg, 40 μmol) and DIBAH (40 μL, 1.0 M in hexane, 40 μmol) in THF (2 mL) at 0 °C. The resultant mixture was stirred at 0 °C and monitored by GLC analysis. After 4 h, an aliquot was analyzed by GLC with decane as an internal standard. Analysis indicated the formation of the title compound in 75% yield.

**(b) (1*E*,3*E*)-1-Chloro-4-phenyl-1,3-butadiene.** The title compound was prepared according to Representative Procedure D except that (*E*)-1-iodo-2-phenylethylene (460 mg, 2.0 mmol) and (*E*)-1-iodo-2-chloroethylene (452 mg, 2.4 mmol) were used. Yield: 280 mg (85%); Stereoisomeric purity: >99%; <sup>1</sup>H NMR (300 MHz, CDCl<sub>3</sub>) δ 6.24 (d, *J* = 13.5 Hz, 1 H), 6.4-6.7 (m, 3 H), 7.15-7.3 (m, 5 H); <sup>13</sup>C NMR (75 MHz, CDCl<sub>3</sub>) δ 120.88, 124.56, 126.39 (2C), 127.88, 128.60 (2C), 133.13, 133.80, 136.53; IR (neat) 3154, 3066, 1949, 1638, 1584, 1196, 974, 908 cm<sup>-1</sup>.

**(c) (1*E*,3*Z*)-1-Bromo-1,3-octadiene.** The title compound was prepared according to Representative Procedure D except that (*Z*)-1-iodo-1-hexene (420 mg, 2.0 mmol) was used. Yield: 308 mg (82%); Stereoisomeric purity: >98%; <sup>1</sup>H NMR (300 MHz, C<sub>6</sub>D<sub>6</sub>) δ 0.93 (t, *J* = 6.5 Hz, 3 H), 1.2-1.3 (m, 4 H), 1.9-2.0 (m, 2 H), 5.42 (dt, *J* = 7.8 Hz, 10.6 Hz, 1 H), 5.80 (dd, *J* = 10.6 and 11.1 Hz, 1 H), 6.08 (d, *J* = 13.3 Hz, 1 H), 7.13 (dd, *J* = 11.1 and 13.3 Hz, 1 H); <sup>13</sup>C NMR (75 MHz, C<sub>6</sub>D<sub>6</sub>) δ 14.03, 22.44, 27.70, 31.73, 109.21,

126.14, 133.42, 133.51; IR (neat) 2958, 1696, 1466, 732  $\text{cm}^{-1}$ ; HRMS calculated for  $\text{C}_8\text{H}_{13}\text{Br}$   $[\text{M}]^+$ : 188.0201; found: 188.0205.

**(d) (*E*)-1-Bromo-2-phenylethylene.<sup>[f]</sup>** The title compound was prepared according to Representative Procedure D except that iodobenzene (408 mg, 2.0 mmol) was used. Yield: 329 mg (90%); Stereoisomeric purity: >99%;  $^1\text{H}$  NMR (300 MHz,  $\text{CDCl}_3$ )  $\delta$  6.71 (d,  $J = 14.0$  Hz, 1 H), 7.07 (d,  $J = 14.0$  Hz, 1 H), 7.2-7.35 (m, 5 H);  $^{13}\text{C}$  NMR (75 MHz,  $\text{CDCl}_3$ )  $\delta$  106.47, 126.00 (2C), 128.15, 128.67 (2C), 135.78, 137.03; IR (neat) 3105, 3060, 1874, 1802, 1675, 1608, 1574, 940, 732  $\text{cm}^{-1}$ .

**(e) (*E*)-1-Bromo-2-(4'-cyanophenyl)ethylene.<sup>[g]</sup>** The title compound was prepared according to Representative Procedure D except that 4-bromobenzonitrile (364 mg, 2.0 mmol) was used. Yield: 295 mg (70%); Stereoisomeric purity: >99%;  $^1\text{H}$  NMR (300 MHz,  $\text{CDCl}_3$ )  $\delta$  6.95 (d,  $J = 14.1$  Hz, 1 H), 7.11 (d,  $J = 14.1$  Hz, 1 H), 7.38 (d,  $J = 8.3$  Hz, 2 H), 7.61 (d,  $J = 8.3$  Hz, 2 H);  $^{13}\text{C}$  NMR (75 MHz,  $\text{CDCl}_3$ )  $\delta$  110.75, 111.46, 118.48, 126.44 (2C), 132.50 (2C), 135.51, 139.90; IR (neat) 2255, 2230, 1923, 1795, 1601, 958, 846, 783  $\text{cm}^{-1}$ .

**(f) (*E*)-1-Bromo-2-(4'-methoxy-phenyl)ethylene.<sup>[h]</sup>** The title compound was prepared according to Representative Procedure D except that 4-iodoanisole (468 mg, 2.0 mmol) was used. Yield: 349 mg (82%); Stereoisomeric purity: >99%;  $^1\text{H}$  NMR (300 MHz,  $\text{CDCl}_3$ )  $\delta$  3.80 (s, 3 H), 6.60 (d,  $J = 14.1$  Hz, 1 H), 6.84 (d,  $J = 8.6$  Hz, 2 H), 7.03 (d,  $J = 14.1$  Hz, 1 H), 7.22 (d,  $J = 8.6$  Hz, 2 H);  $^{13}\text{C}$  NMR (75 MHz,  $\text{CDCl}_3$ )  $\delta$  56.30,



104.54, 114.62 (2C), 127.69 (2C), 129.05, 136.78, 159.66. IR (neat) 3000, 2958, 2838, 1952, 1880, 1724, 1607, 1441, 1370, 945, 905, 732 cm<sup>-1</sup>.

## References:

- [a] Coulson, D. R. *Inorg. Syn.* **1990**, 28, 107.
- [b] Kranenburg, M.; Kamer, P. C. J.; van Leeuwen, P. W. N. M. *Eur. J. Inorg. Chem.* **1998**, 155.
- [c] Farina, V.; Krishnan, B. *J. Am. Chem. Soc.* **1991**, 113, 9585.
- [d] Ratovelomanana, V.; Linstrumelle, G. *Tetrahedron Lett.* **1984**, 25, 6001.
- [e] Abbas, S.; Hayes, C. T.; Worden, S. *Tetrahedron Lett.* **2000**, 41, 3215.
- [f] On, H. P.; Lewis, W.; Zweifel G. *Synthesis* **1981**, 999.
- [g] Shinozaki, H.; Kubota, M.; Yagi, O.; Tada, M. *Bull. Chem. Soc. Jpn.* **1976**, 49, 2280.
- [h] Naskar, D.; Chowdhury, S. *Tetrahedron Lett.* **1998**, 39, 699.
